# Supplementary material for: Dual Mkk4 and Mkk7 Gene Deletion in Adult Mouse Causes an Impairment of Hippocampal Immature Granule Cells
Source: MDPI journal article supplement (doi:10.3390/ijms22179545), 2021-09-02
Supplement: s1 [file s1]

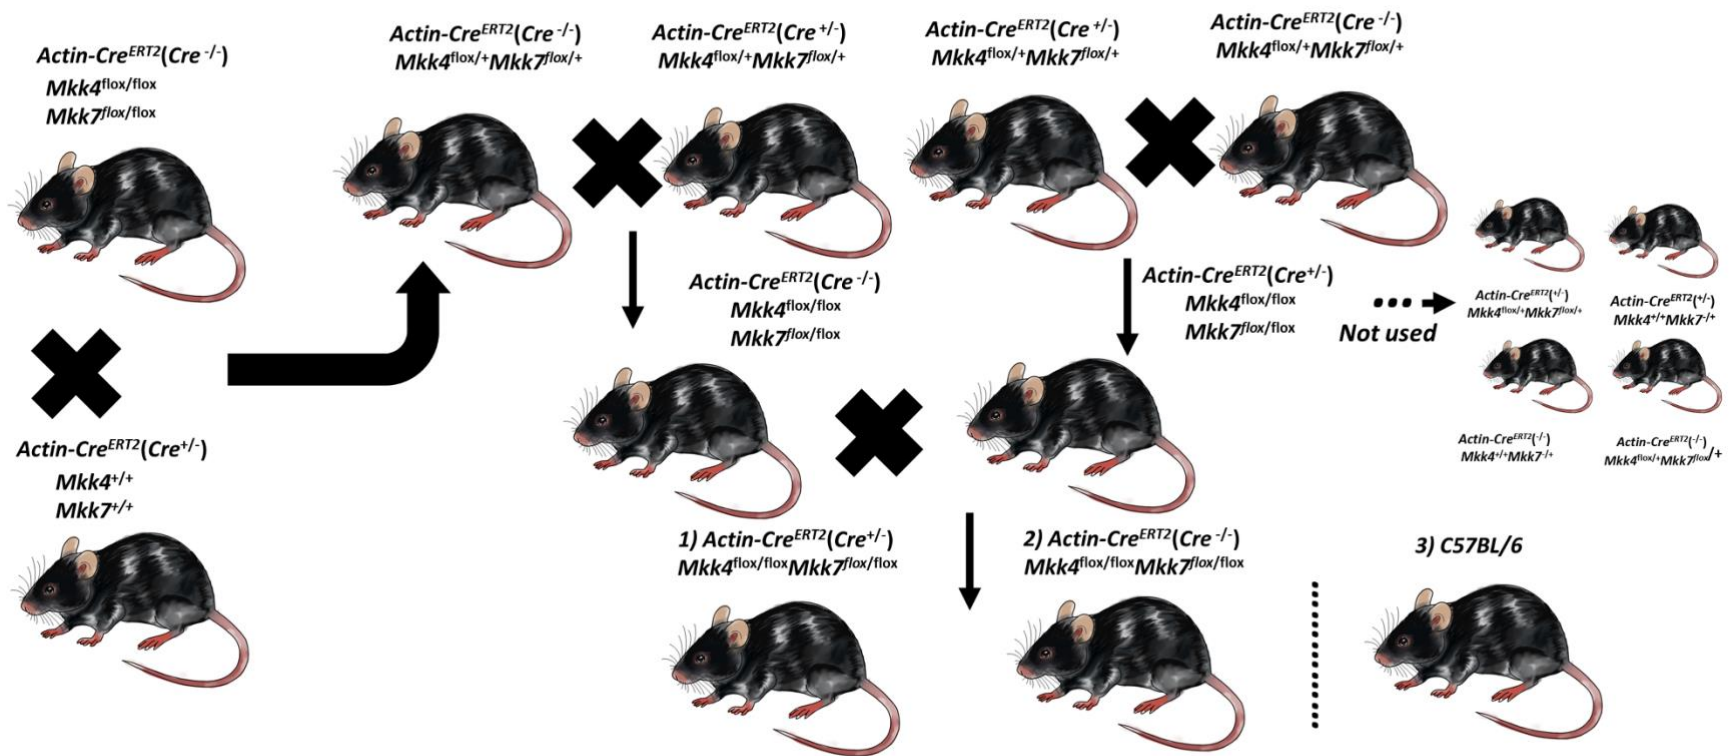

**Figure S1. Generation of *Actin-Cre<sup>ERT2</sup>(Cre<sup>+/-</sup>)*, *Mkk4<sup>flox/flox</sup>*, *Mkk7<sup>flox/flox</sup>* mice.** Crossbreeding employed to get mice with the genotype handled in this investigation. Hemizygous *Actin-Cre<sup>ERT2</sup>(Cre<sup>+/-</sup>)*, *Mkk4<sup>flox/flox</sup>*, *Mkk7<sup>flox/flox</sup>* mice (1) was used to induce dual deletion of *Mkk4* and *Mkk7* genes after tamoxifen administration *Actin-Cre<sup>ERT2</sup>(Cre<sup>-/-</sup>)*, *Mkk4<sup>flox/flox</sup>*, *Mkk7<sup>flox/flox</sup>* (2) and wild-type C57BL/6 (3) mice were used in control groups.

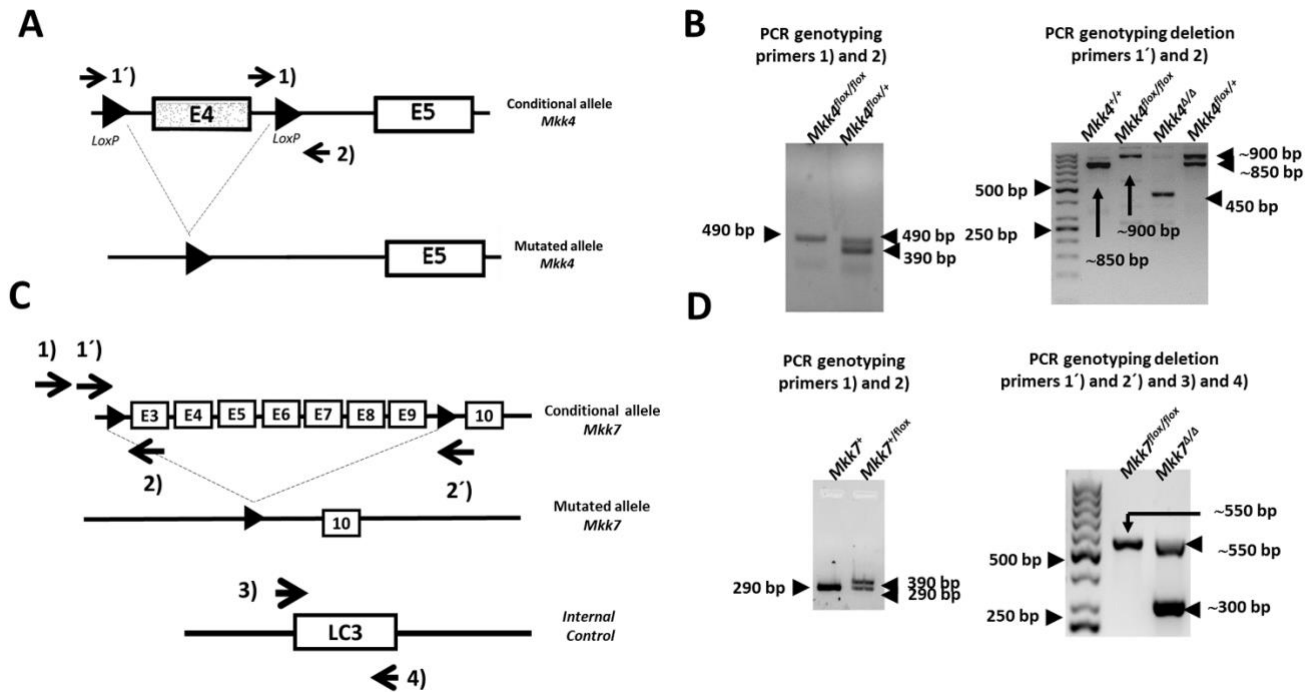

**Figure S2. Strategy to genotype and to detect the deletion of *Mkk4* and *Mkk7* genes.** **A.** Genomic region of conditional allele *Mkk4*, LoxP sequences flanked exon 4. Primers used for genotyping are 1) and 2). Primers employed for detecting deletion are 1') and 2'). **B.** In the left side, representative image of agarose gel for PCR genotyping test shows the band for *Mkk4*<sup>+</sup> (390 bp) and *Mkk4*<sup>lox</sup> (490 bp). On the right side, an image of agarose gel for PCR deletion test shows a band for *Mkk4*<sup>+</sup> (850 bp), *Mkk4*<sup>lox</sup> (900 bp) and *Mkk4*<sup>Δ</sup> (450 bp). **C.** Genomic region of conditional allele *Mkk7*, LoxP sequences flanked exon 3 to exon 9. Primers used for genotyping are 1) and 2). Primers used for deletion are 1') and 2') plus a pair of primers 3) and 4) that amplifies a LC3 region, used as an internal control. **D.** Left, representative image of agarose gel for PCR genotyping test showing the band for *Mkk4*<sup>+</sup> (290 bp) and *Mkk4*<sup>lox</sup> (390 bp). The right agarose gel shows bands obtained for PCR deletion, *Mkk7*<sup>Δ/Δ</sup> genotype shows a band of 300 bp (*Mkk7*<sup>Δ</sup>) for deletion and 550 bp for Internal Control, *Mkk7*<sup>lox/lox</sup> genotype shows only a band of 550 bp (Internal Control).
